# Supplementary material for: The role of the acetabular labrum in hip dysplasia: A literature overview
Source: PubMed Central journal article supplement — Acta Orthop. 2013 Feb 26;84(1):60–4. doi: 10.3109/17453674.2013.765626 (PMC3584604; doi:10.3109/17453674.2013.765626), 2013-02-26
Supplement: ORT-84-60-s5645.pdf [file ORT-84-60-s5645.pdf]

## Supplementary article data

# The role of the acetabular labrum in hip dysplasia

## A literature overview

Charlotte Hartig-Andreasen<sup>1</sup>, Kjeld Søballe<sup>1</sup>, and Anders Troelsen<sup>2</sup>

<sup>1</sup>Orthopaedic Research Unit, Aarhus University Hospital, Aarhus; <sup>2</sup>Department of Orthopedics, Hvidovre University Hospital, Copenhagen, Denmark.

Correspondence: hartig@dadlnet.dk

Submitted 12-05-09. Accepted 12-10-02

### Appendix 1. Different handling of labral pathology despite underlying bony malformation

| Study               | No. (hips) | FU (mo) | Bony deformity                                                                                                         | Treatment                                                                                                                                                                               | Results                                                                                                                                                                                                                                                       | Study limitations                                                                                                                                                                                                                                                                |
|---------------------|------------|---------|------------------------------------------------------------------------------------------------------------------------|-----------------------------------------------------------------------------------------------------------------------------------------------------------------------------------------|---------------------------------------------------------------------------------------------------------------------------------------------------------------------------------------------------------------------------------------------------------------|----------------------------------------------------------------------------------------------------------------------------------------------------------------------------------------------------------------------------------------------------------------------------------|
| Fitzgerald 1995     | 56         | 53      | Majority of the hips had "normal" anteroposterior radiographs. 4 had evidence of previous acetabular or pelvic surgery | Diagnostic injection with celestone and marcaine followed by partial weight bearing, followed by complete or partial excision of the torn labrum through open arthrotomy or arthroscopy | 7 hips showed complete recovery, 49 hips had surgery. 43 out the 49 hips improved by treatment. 13 hips required additional surgery for chronic trochanteric bursitis after arthrotomy. 3 hips without improvement lesions of the femoral head                | Lack of precise description of the pelvic radiographs. Particularly if any signs of dysplasia or FAI were present                                                                                                                                                                |
| Farjo et al. 1999   | 28         | 34      | 14 hips were dysplastic or arthritic                                                                                   | Arthroscopic debridement                                                                                                                                                                | 13 patients had good patient reported outcome, if arthritis was present the outcome was poor. No statistic correlation between outcome and mechanical symptoms, tear type, localization, dysplasia etc.                                                       | 14 hips described with arthritis or dysplasia<br>Description of the remaining radiographs is lacking                                                                                                                                                                             |
| Byrd and Jones 2003 | 48         | 27      | Hip dysplasia (CE<25°)                                                                                                 | Partial excision of a torn labrum or lig. teres. Chondroplasty and microfracture treatment if needed. Loose bodies were removed                                                         | Modified HHS was improved. No differences between the dysplastic and borderline dysplastic group. The hips with loose bodies or debridement of ruptured lig. teres did best. Labral or chondral lesions results were average. Worst outcome in arthritic hips | Small patient number<br>Only short term followup                                                                                                                                                                                                                                 |
| Peters et al. 2006  | 83         | 46      | Hip dysplasia (59 classic) (22 retroverted) (2 Legg-Calvé Perthes)                                                     | PAO or arthrotomy and PAO. Partial labrum excision and osteoplasty when indicated                                                                                                       | 49 patient underwent arthrotomy had labral tears that were taken care of during surgery. Good HHS (90 points) at followup                                                                                                                                     | The study is used to describe the learning curve of performing PAO. Decision to routinely arthrotomy, was taken in the latter third of the study period, to be able to optimize treatment. A comparison between the non-arthrotomy and the arthrotomy group could be interesting |

|                     |    |     |                                                                                                                                  |                                                                                                                                                                                                                                                   |                                                                                                                                                                                                                                                                   |                                                                                                                                                                                     |
|---------------------|----|-----|----------------------------------------------------------------------------------------------------------------------------------|---------------------------------------------------------------------------------------------------------------------------------------------------------------------------------------------------------------------------------------------------|-------------------------------------------------------------------------------------------------------------------------------------------------------------------------------------------------------------------------------------------------------------------|-------------------------------------------------------------------------------------------------------------------------------------------------------------------------------------|
| Burnett et al. 2006 | 66 | 16  | Retrospective radiographic evaluation showed: 24 normal hips. 42 demonstrated hip dysplasia, impingement or degenerative changes | Non-operative treatment prior arthroscopy. Arthroscopic labral debridement                                                                                                                                                                        | Conservative treatment unsuccessful for symptomatic tear. After arthroscopy HHS increased and 59 patients reported clinical improvement. Recommend osteotomy in most DDH hips. In FAI they recommend arthroscopy maybe combined with limited open arthrotomy      | Lack of a control group<br>Short term followup                                                                                                                                      |
| Byrd and Jones 2009 | 31 | 120 | Radiographic evaluation missing                                                                                                  | Arthroscopic labral debridement                                                                                                                                                                                                                   | HHS significant increased at followup. If arthritis was present prior to arthroscopy they had a higher rate of conversion to THA                                                                                                                                  | Few patients. The lack of radiographic description besides osteoarthritis. Where there any bony abnormalities?                                                                      |
| Parvizi et al. 2009 | 36 | 42  | Hip dysplasia (30 hips)<br>Retroversion (6 hips)                                                                                 | Arthroscopic labral debridement                                                                                                                                                                                                                   | Significant improvement during the first 6 weeks of surgery. In 24 patients arthroscopy failed to control symptoms. 16 patients had further surgery. They do not recommend hip arthroscopy alone for dysplastic hips                                              | Lack of control group. All had debridement of the labrum. No repairs. Retrospective study                                                                                           |
| Ross et al. 2011    | 73 | 0   | Hip dysplasia (various degree of severity)                                                                                       | Arthroscopy and PAO if mechanical symptoms and a positive MRI were present. Labral tears were repaired or partial resected                                                                                                                        | 5 hips had a labrum without tear or hypertrophy.<br>In 37% of the cases, no intra-articular lesions were found, and the arthroscopy was only diagnostic.                                                                                                          | No followup on the clinical effect, so the long-term effect of extending the PAO with arthroscopy remains unknown                                                                   |
| Kain et al. 2011    | 51 | 0   | Hip dysplasia                                                                                                                    | Outcome measured by WOMAC scores or the need for a THA in 2 groups. 1 group had failed arthroscopic labral debridement and referred to PAO (17 hips). 1 group had primary PAO (matched control 34 hips, all had MRI evidence of labral pathology) | No significant difference in WOMAC score or frequency of THA between the two groups.<br>PAO can be done after failed arthroscopy with good functional outcome.<br>Overall they do not recommend arthroscopy alone, and if decided, closely followup is essential. | Retrospective study, limited number of patients. No long-term followup of the patient with preserved hips. Only given time interval is the known dates of the hips converted to THA |
